# Supplementary material for: Analysis of the Genetic Diversity in Tea Plant Germplasm in Fujian Province Based on Restriction Site-Associated DNA Sequencing
Source: MDPI journal article supplement (doi:10.3390/plants13010100), 2023-12-28
Supplement: s1 [file s1]

# Supplemental Figures

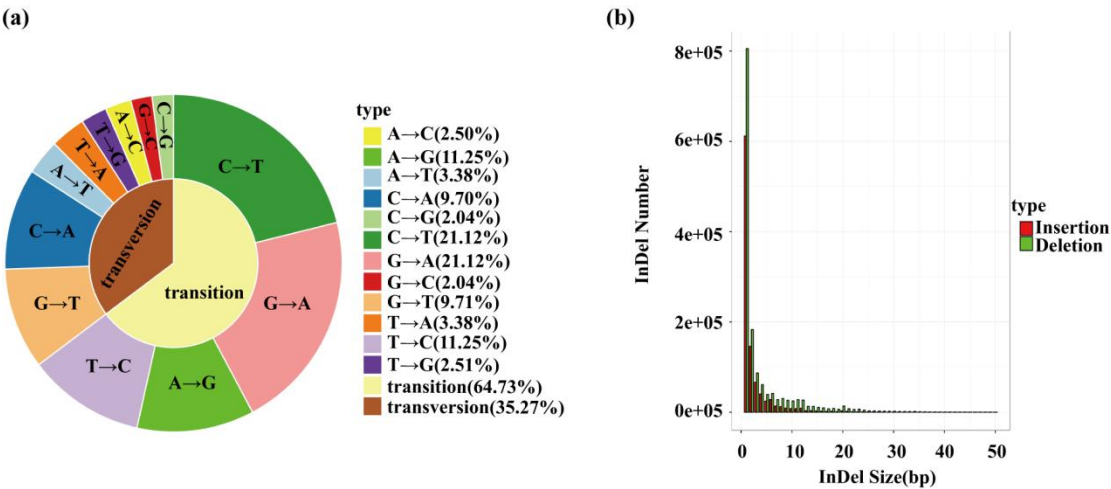

**Supplemental Figure S1.** (a) Statistics on the percentage of SNP types. (b) Insertion deletion variant loci statistics.

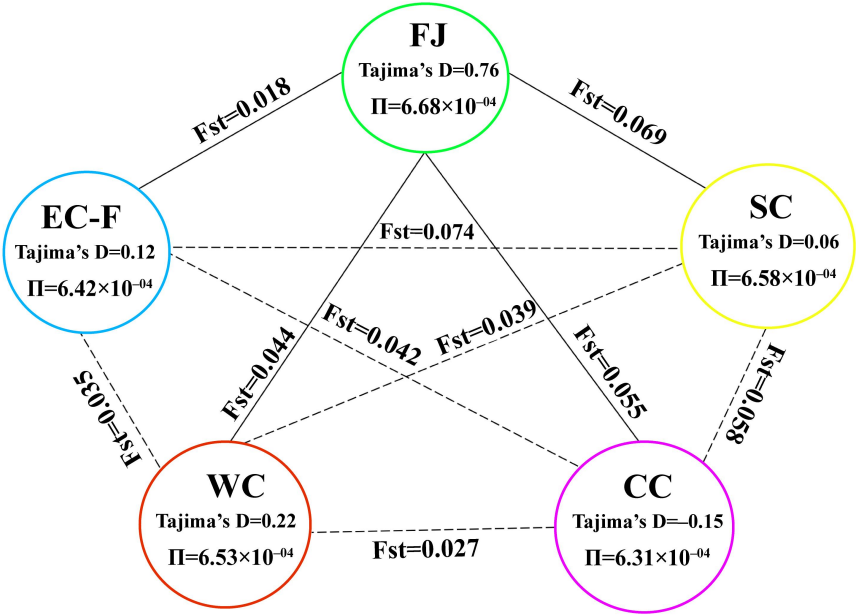

**Supplemental Figure S2.** Nucleotide diversity, neutrality test and genetic index relationships of tea plants in various regions. FJ: Fujian; EC-F: Eastern China excluding Fujian; WC: Western China; CC: Central China; SC: Southern China

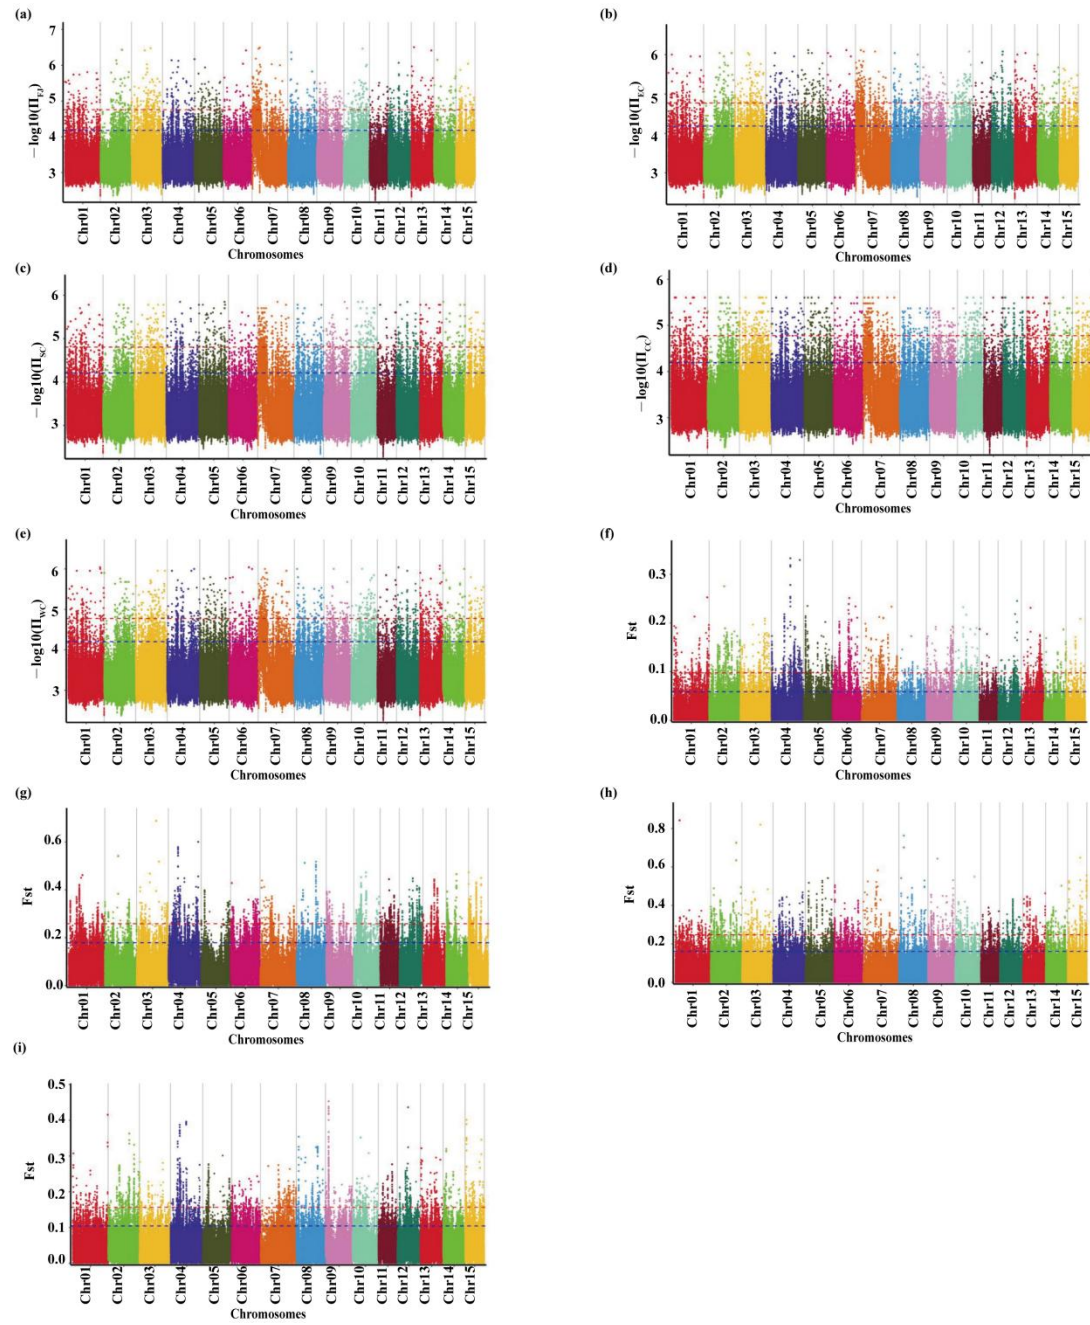

**Supplemental Figure S3.** (a-e) Nucleotide diversity of tea plants in different regions. (a) Fujian; (b) Eastern China excluding Fujian (EC-F); (c) Southern China (d) Central China; (e) Western China; (f-i) Genetic differentiation index of tea plants in different regions. (f) EC-F and Fujian (ECF); (g) Southern China and Fujian (SCF); (h) Central China and Fujian (CCF); (i) Western China and Fujian (WCF);

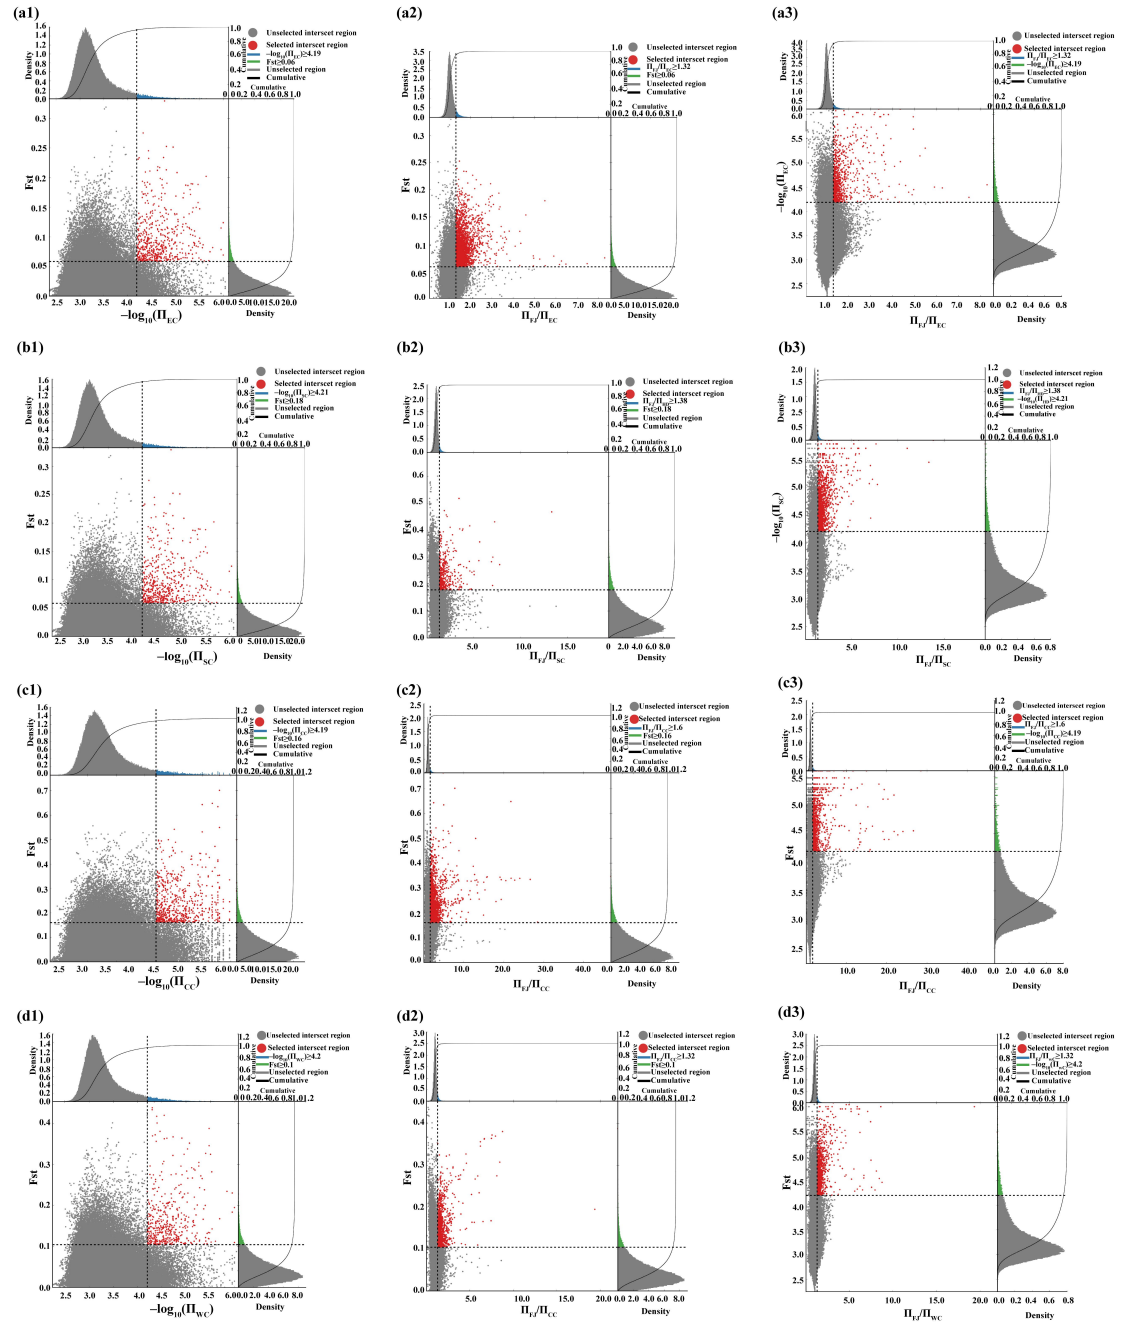

**Supplemental Figure S4.** Top 5% selected regions of the genome. (a1), (a2), and (a3) are ECF; (b1), (b2), and (b3) are SCF; (c1), (c2), and (c3) are CCF; (d1), (d2), and (d3) are WCF.

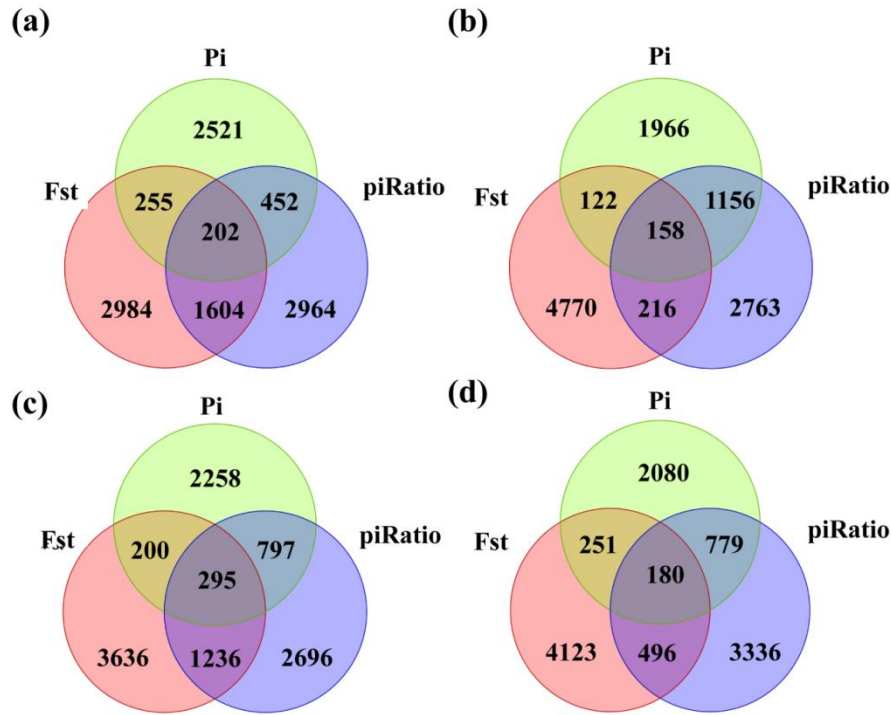

**Supplemental Figure S5.** A number of genes identified in the top 5% of selected genome regions. (a) ECF; (b) SCF; (c) CCF; (d) WCF.

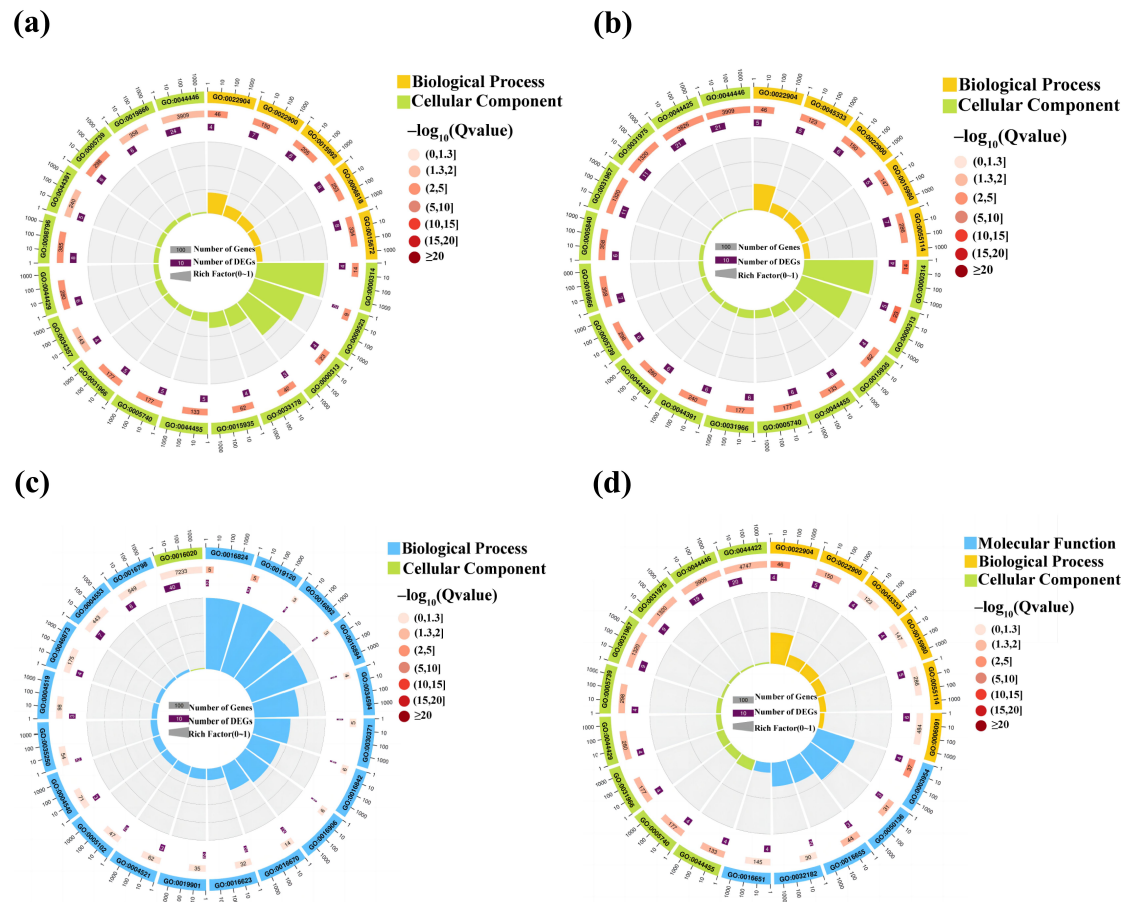

**Supplemental Figure S6.** Top 20 GO annotations of selected genes in each region. (a) ECF; (b)



SCF; (c) CCF; (d) WCF.

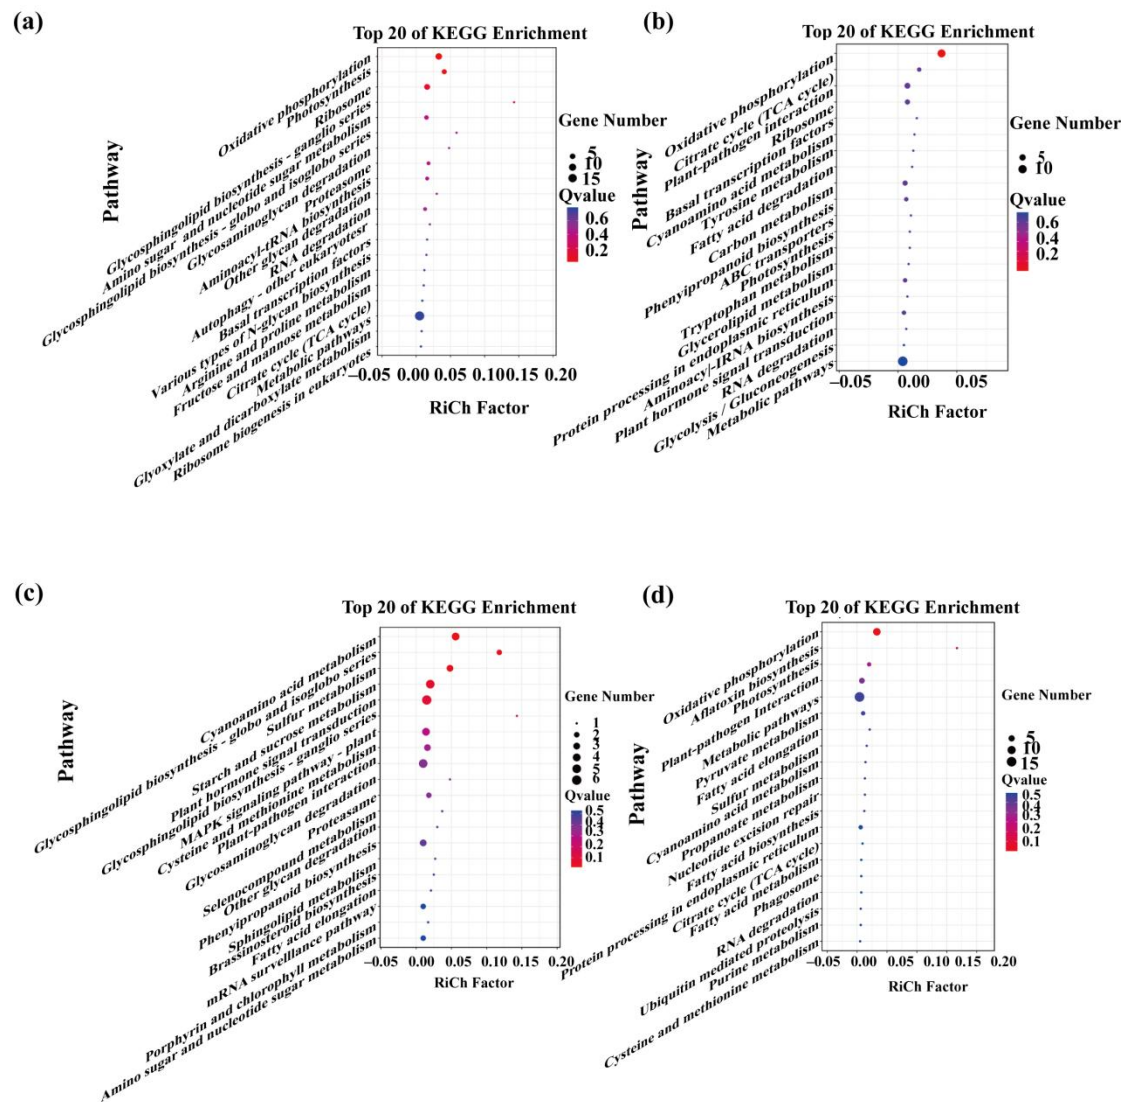

**Supplemental Figure S7.** Top 20 KEGG annotations of selected genes in each region. (a) ECF; (b) SCF; (c) CCF; (d) WCF.

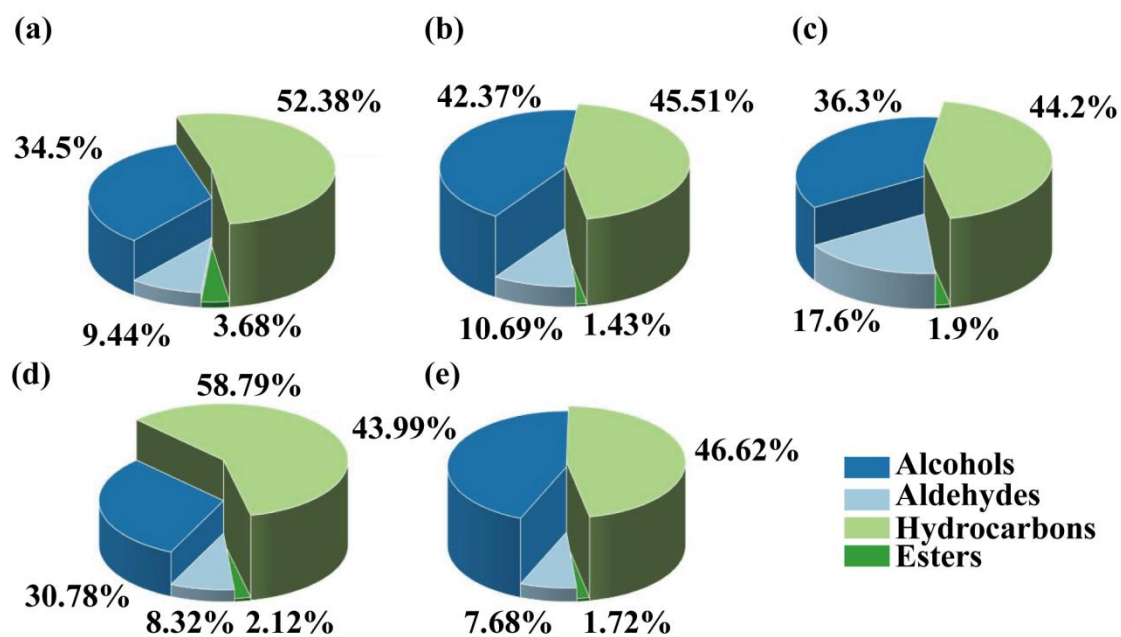

**Supplemental Figure S8.** The proportion of volatile components in fresh tea leaves by region. (a) Western China; (b) Central China; (c) Southern China; (d) EC-F; (e) Fujian.

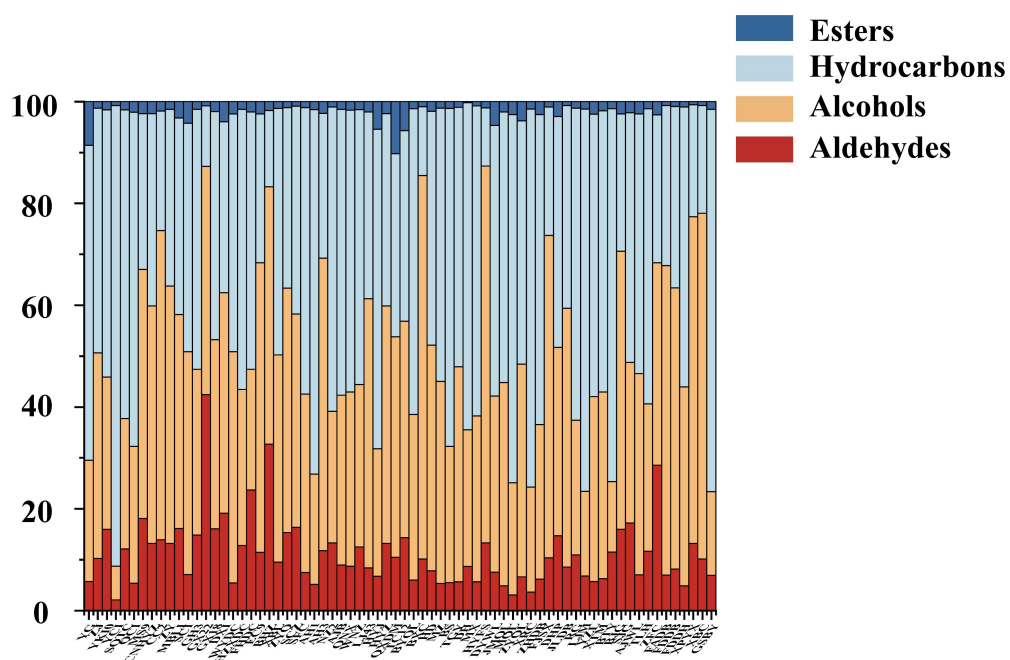

**Supplemental Figure S9.** The content of volatile components in fresh tea leaves.

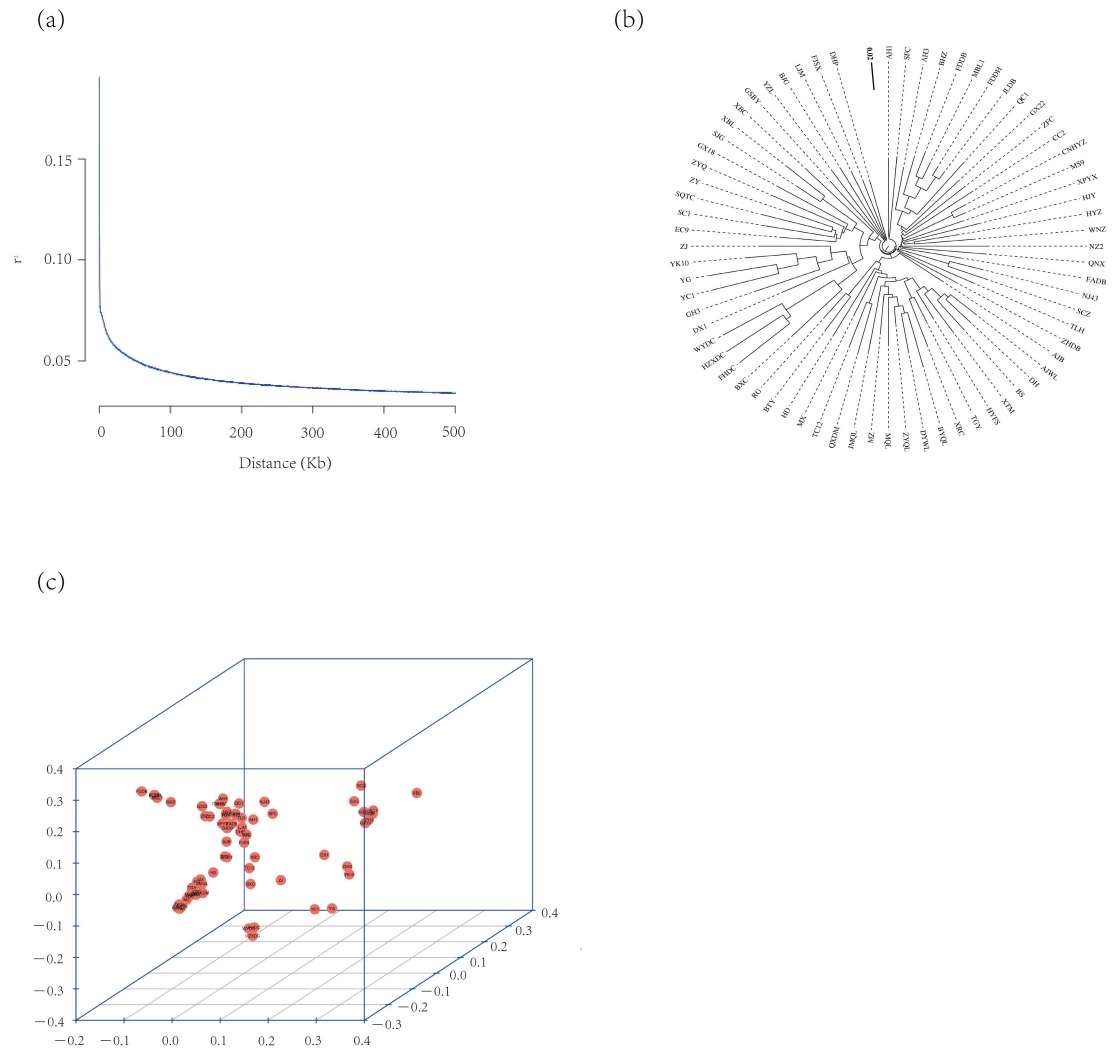

**Supplemental Figure S10.** (a) Linkage disequilibrium; (b) Phylogenetic tree based on filtered SNPs; (c) Principal component analysis (PCA) based on filtered SNPs.

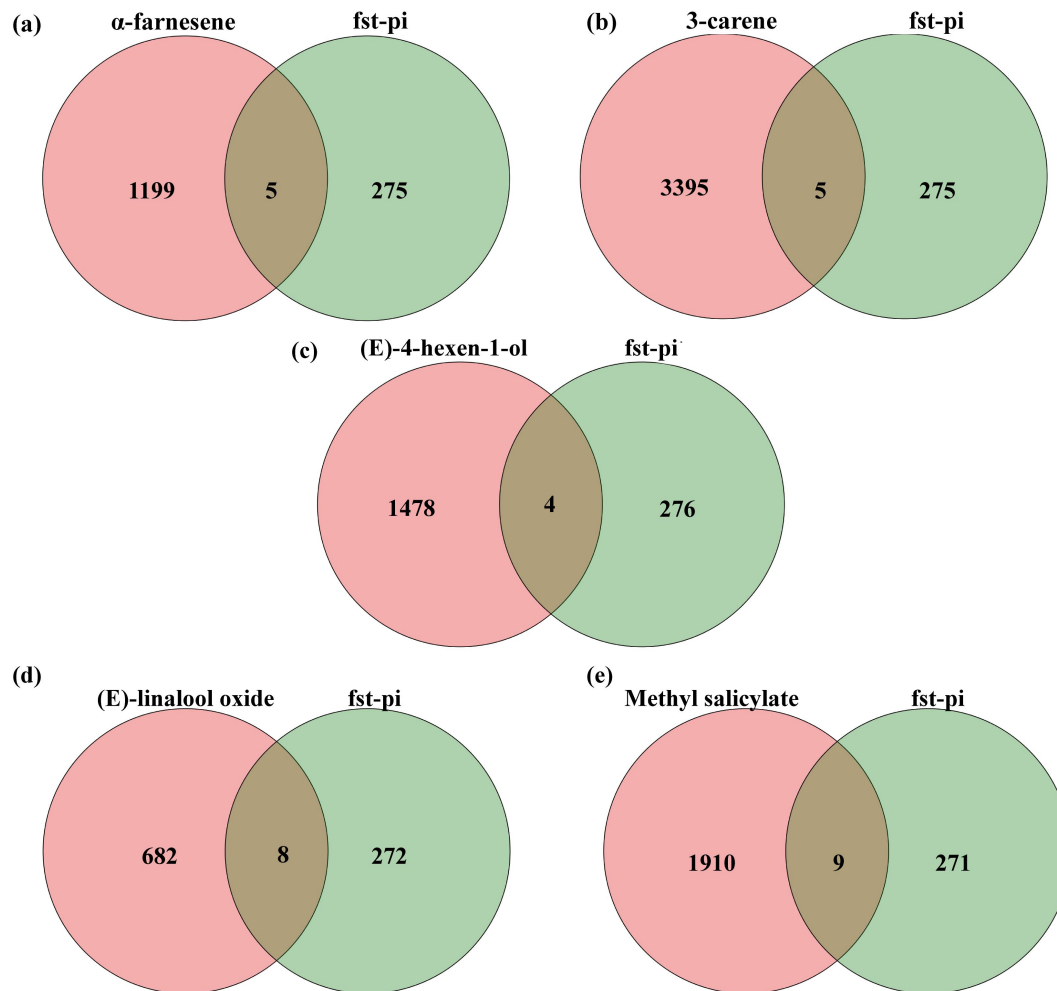

**Supplemental Figure S11.** Selective pressure volatile-associated genes.



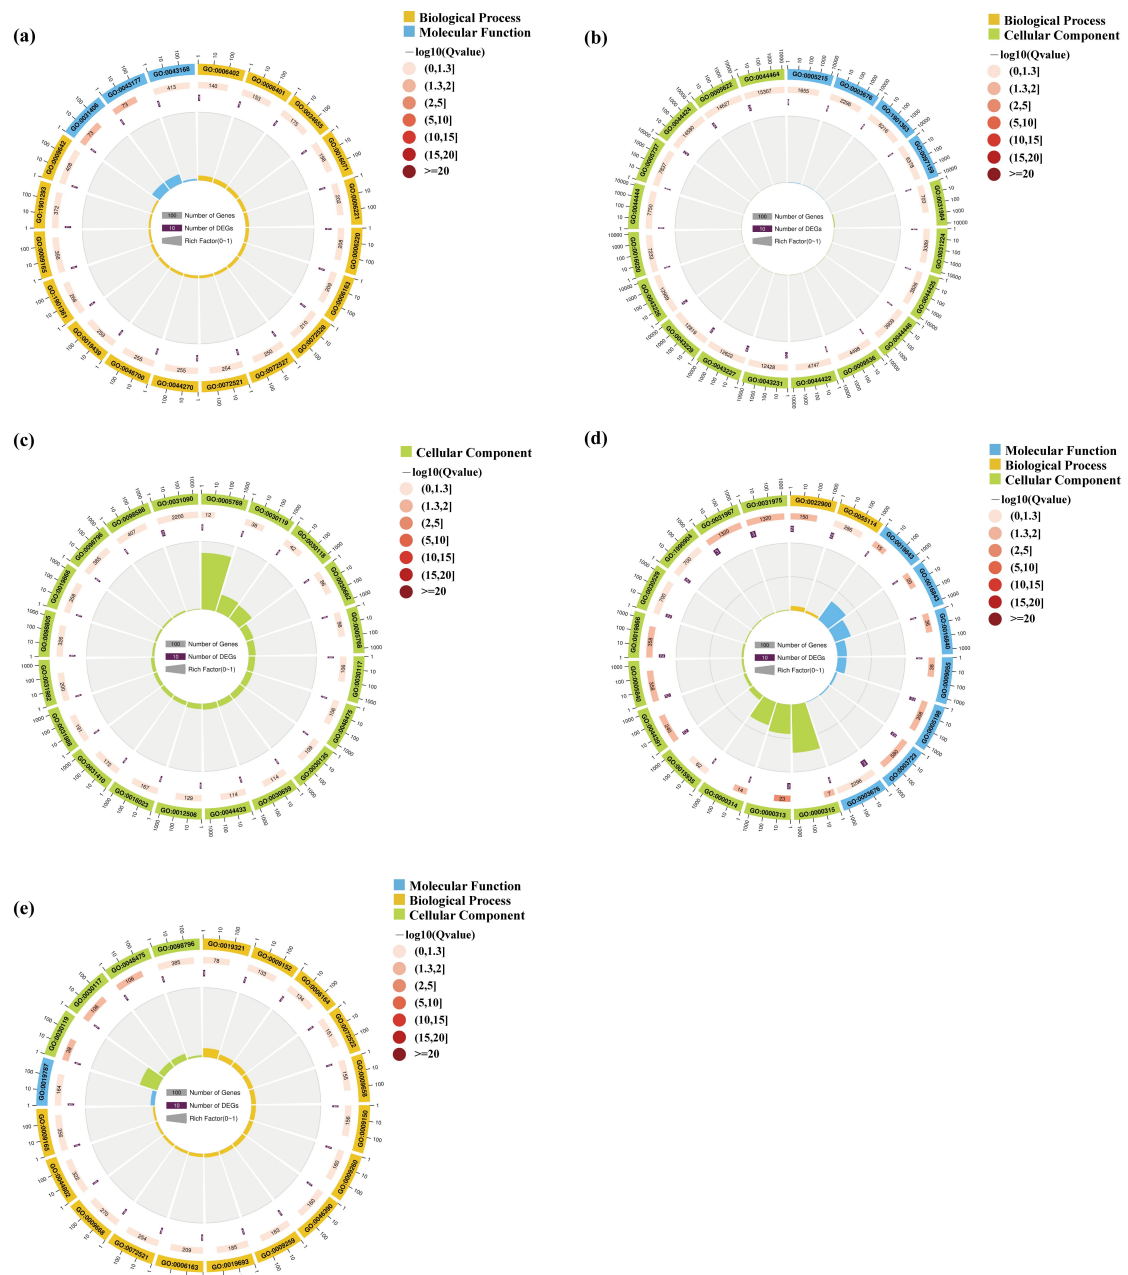

**Supplemental Figure S12.** GO annotation of genes that were significantly associated with selected genes and traits. (a)  $\alpha$ -farnesene; (b) 3-carene; (c) (E)-4-hexen-1-ol; (d) (E)-linalool oxide; (e) methyl salicylate.
